# Supplementary material
Source: PubMed Central journal article supplement (PMC4530056)

**A**

□ PBS  
■ alpha galactosylceramide

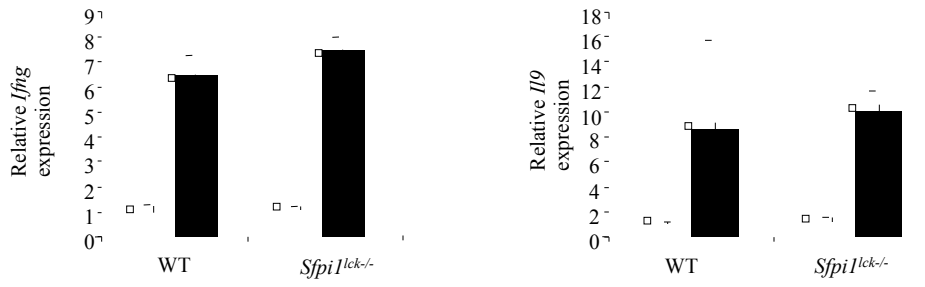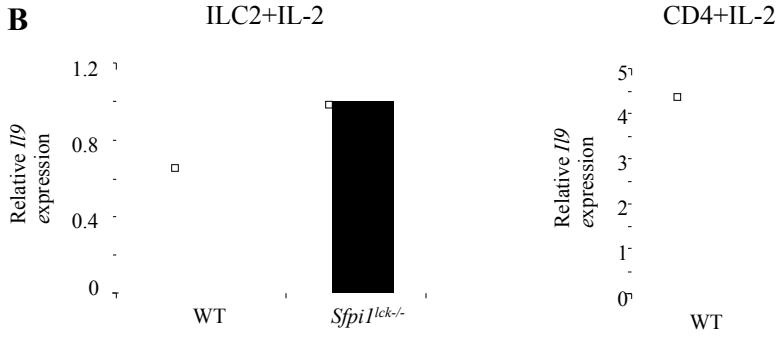

Supplement: NIHMS660937-supplement-supplement_1.pdf [file NIHMS660937-supplement-supplement_1.pdf]
